# Supplementary material for: Short-time spreading dynamics of elastic drops
Source: Royal Society of Chemistry journal article supplement (doi:10.1039/d5ma00896d), 2025-12-16
Supplement: d5ma00896d1.pdf [file d5ma00896d1.pdf]

## Supplementary Information: Short time spreading dynamics of elastic drops

Surjyasish Mitra,<sup>a</sup> A-Reum Kim,<sup>b</sup> Boxin Zhao,<sup>b,\*\*</sup> and Sushanta K. Mitra<sup>a,\*\*</sup>

<sup>a</sup> Micro & Nano-scale Transport Laboratory, Department of Mechanical and Mechantronics Engineering, Waterloo Institute for Nanotechnology, University of Waterloo, 200 University Avenue West, Waterloo, ON N2L 3G1, Canada

<sup>b</sup>Department of Chemical Engineering, Waterloo Institute for Nanotechnology, University of Waterloo, 200 University Avenue West, Waterloo, ON N2L 3G1, Canada

\*Corresponding author: zhaob@uwaterloo.ca \*\*Corresponding author: skmitra@uwaterloo.ca

Within this Supplemental Material, we present additional experimental details like rheology, detailed derivations of the scaling laws mentioned in the main text, and a additional plot.

### Strain amplitude measurements

For the prepared PAAm, strain amplitude sweep was performed on a dynamic shear rheometer (Kinexus Rotational Rheometer, Malvern Instruments) at 1 Hz frequency (see Fig. S1). From the measured  $G'$  and  $G''$ , we observed that for PAAm 6.5 wt%, the Linear Viscoelastic Region (LVR) is sustained till approximately 0.1% strain, beyond which the material response deviates due to the relatively weak polymer network of the PAAm (Fig. S1a). Further, beyond 20% strain,  $G''$  overshoots  $G'$  and the material eventually ruptures around 100% strain. For PAAm 30 wt%, the LVR is observed for approximately 1% strain due to the relatively stiffer polymer network (Fig. S1b). Although the material response deviates beyond 1% strain, a drastic drop in both  $G'$  and  $G''$  is only observed at 120% strain, highlighting close to rupture scenario.

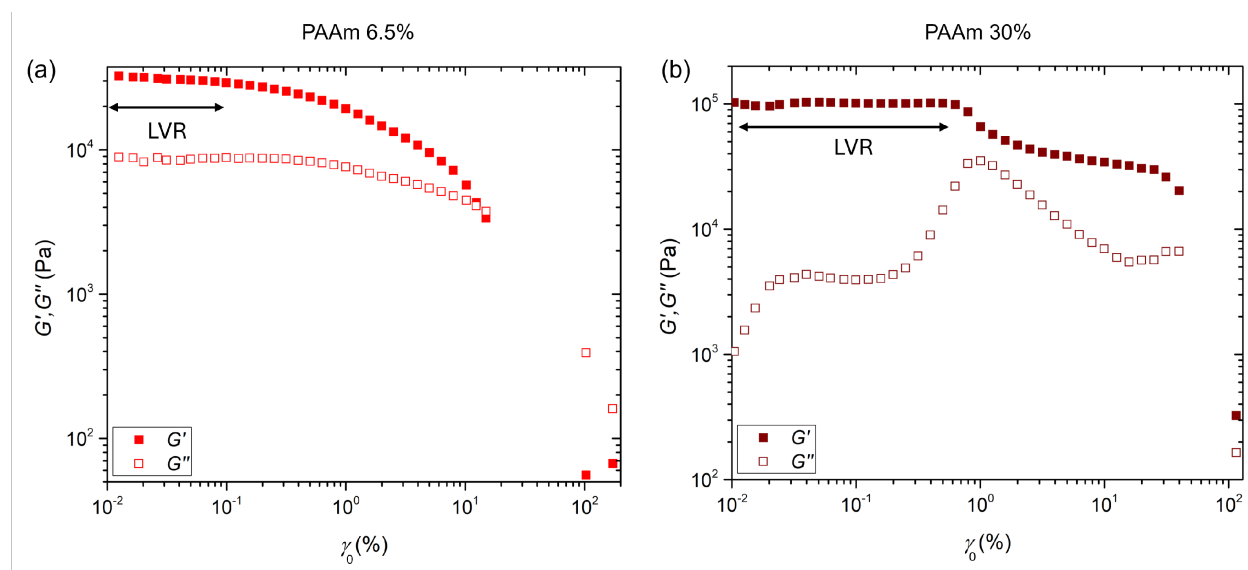

FIG. S1. Variation of shear storage modulus ( $G'$ ) and shear loss modulus ( $G''$ ) with shear strain  $\gamma_0$  (%) for (a) PAAm 6.5 wt.% monomer and (b) PAAm 30 wt.% monomer. The Linear Viscoelastic Regions (LVR) are marked for clarity. The measurements are performed at a frequency of 1 Hz.

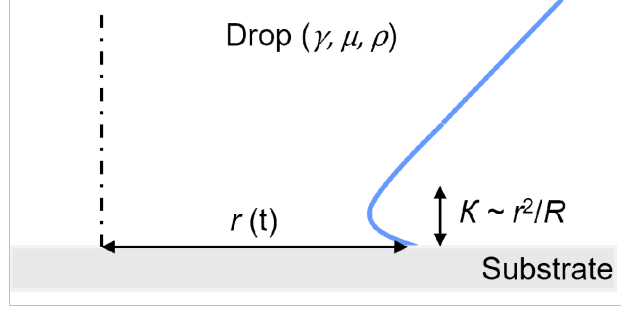

FIG. S2. Schematic of a spreading drop.  $r$  is the time-dependent drop-substrate footprint radius, i.e., spreading radius. The curvature driving the CL motion is represented as  $\kappa \sim r^2/R$ , where  $R$  is the initial drop radius.

### Derivation of scaling laws

**1. Inertial-Capillary spreading:** When a liquid drop makes contact with any surface, a large unbalanced surface tension force, i.e.,  $\gamma/\kappa$  drives the contact line (CL) motion, where  $\kappa \sim r^2/R$  is the curvature (Fig. S2) [1, 2]. Here  $r$  is the time-dependent spreading radius and  $R$  is the initial drop radius. For early time spreading, when liquid inertia opposes capillarity, the force balance per unit area of CL can be expressed as,

$$p_{\text{in}} \sim p_{\text{cap}} \quad (1)$$

$$\Rightarrow \rho v^2 \sim \frac{\gamma R}{r^2} \quad (2)$$

$$\Rightarrow \rho \left( \frac{dr}{dt} \right)^2 \sim \frac{\gamma R}{r^2} \quad (3)$$

$$\Rightarrow \left( r \frac{dr}{dt} \right)^2 \sim \frac{\gamma R}{\rho} \quad (4)$$

$$\Rightarrow r \frac{dr}{dt} \sim \sqrt{\frac{\gamma R}{\rho}} \quad (5)$$

$$\Rightarrow \int r dr \sim \sqrt{\frac{\gamma R}{\rho}} \int dt \quad (6)$$

$$\Rightarrow r^2 \sim \sqrt{\frac{\gamma R}{\rho}} t \quad (7)$$

$$\Rightarrow r \sim \left( \frac{\gamma R}{\rho} \right)^{1/4} t^{1/2} \quad (8)$$

In the above derivation  $\rho$  is the liquid density and  $v = dr/dt$  is the CL velocity.

**2. Viscous-Capillary spreading:** Similarly, for early time spreading, when viscosity opposes capillarity, the force balance per unit area of CL can be expressed as,

$$p_{\text{vis}} \sim p_{\text{cap}} \quad (9)$$

$$\Rightarrow \mu \frac{\partial u}{\partial r} \sim \frac{\gamma R}{r^2} \quad (10)$$

$$\Rightarrow \mu \frac{v}{r} \sim \frac{\gamma R}{r^2} \quad (11)$$

$$\Rightarrow \mu \frac{1}{r} \frac{dr}{dt} \sim \frac{\gamma R}{r^2} \quad (12)$$

$$\Rightarrow \int r dr \sim \frac{\gamma R}{\mu} \int dt \quad (13)$$

$$\Rightarrow r^2 \sim \frac{\gamma R}{\mu} t \quad (14)$$

$$\Rightarrow r \sim \left( \frac{\gamma R}{\mu} \right)^{1/2} t^{1/2} \quad (15)$$

In the above derivation  $\mu$  can either be the high shear rate viscosity for weakly elastic polymeric liquids obtained from shear rate ramp measurements or the viscosity obtained from rheology fitting for drops/spheres with moderate or high Young's modulus.

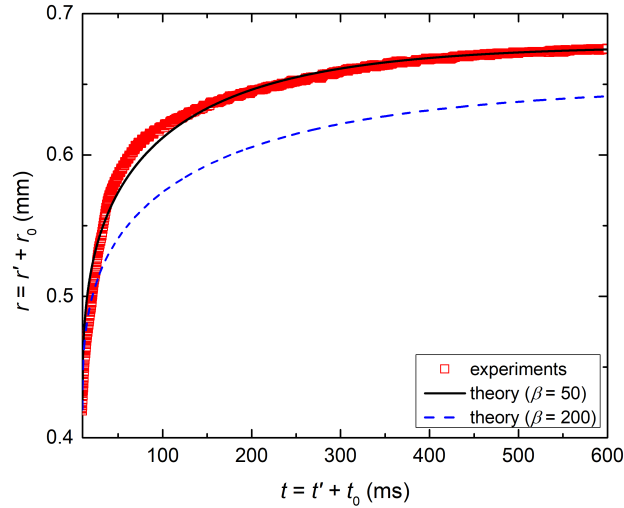

FIG. S3. Evolution of the spreading radius  $r$  for 1mm radius PAAm 6.5% drops ( $E_0 = 0.16$  kPa) on glass substrates in regime II. The symbols represent experimental data, whereas the solid lines represent the theoretical solution for two different  $\beta$  values. Here, the origin of the x-axis is at  $t = 10$ ms.

- 
- [1] A. Eddi, K. G. Winkels, and J. H. Snoeijer, Short time dynamics of viscous drop spreading, *Phys. Fluids* **25**, [10.1063/1.4788693](https://doi.org/10.1063/1.4788693) (2013).  
[2] S. Mitra and S. K. Mitra, Understanding the early regime of drop spreading, *Langmuir* **32**, 8843 (2016).
